# Supplementary material
Source: publisher figshare collection journal article supplement (https://geolsoc.figshare.com/articles/dataset/_/3452978)
Supplement: Supplementary file 1 [file 1]

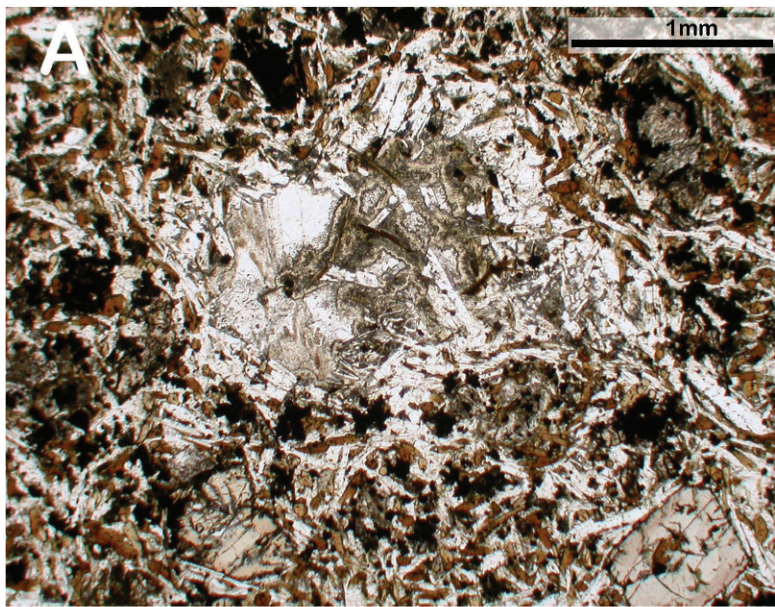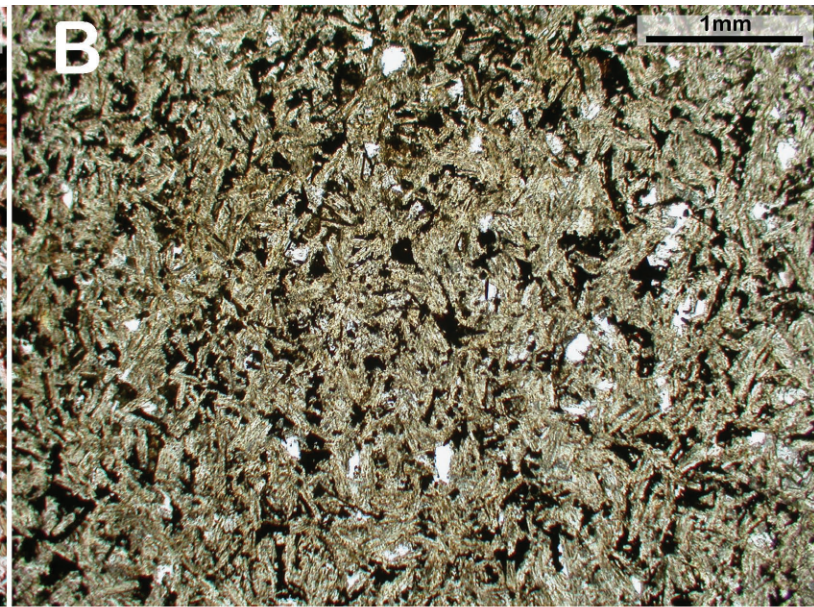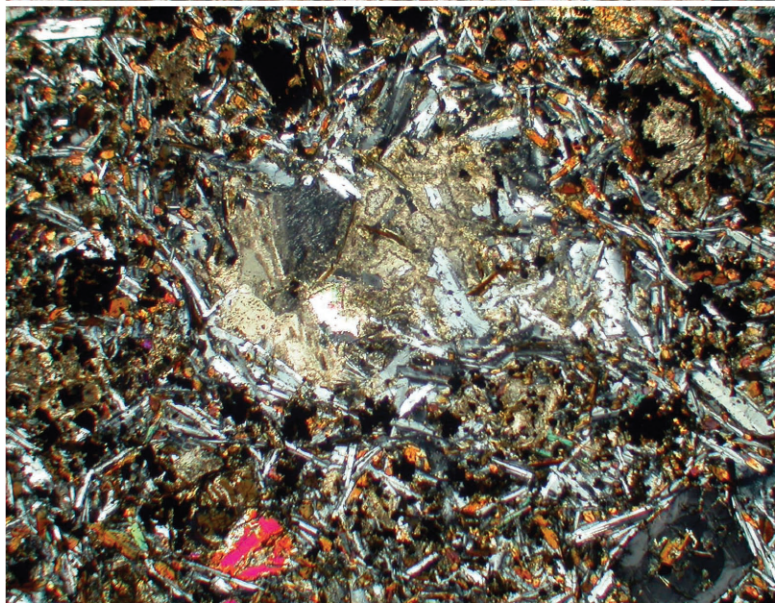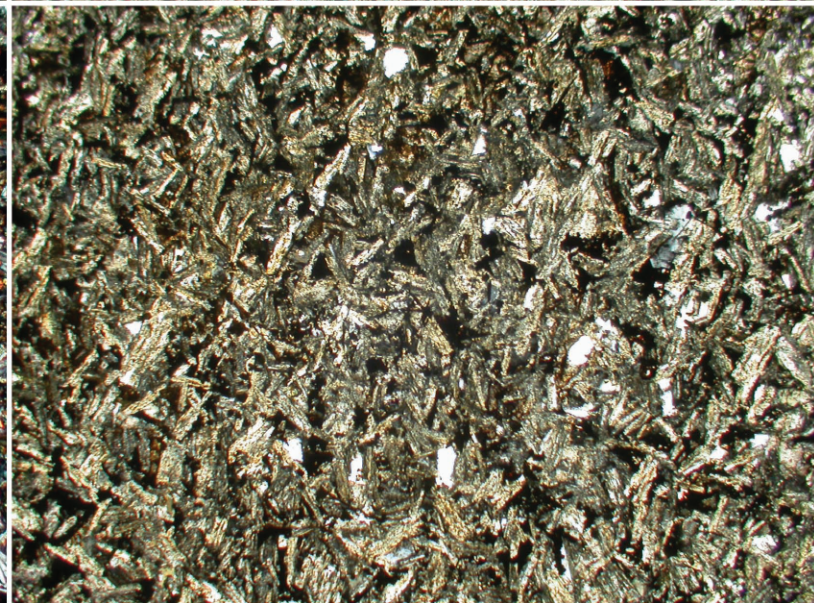

Appendix 1. a) Thin section image of ocellus in the Garthna Geo camptonite, plain polarized (top) and crossed Nicols (bottom). The carbonate core in the centre of the picture consists of calcite (white to light brown) with darker siderite rims. It is intergrown with grey potassic feldspar and albite crystals, dark brown kaersutite and light brown biotite laths. Surrounding the ocellus is a matrix consisting of plagioclase, kaersutite and clinopyroxene, and two clinopyroxene phenocrysts (pink and grey grains in crossed Nicols in lower left and lower right corner, respectively). b) Thin section image of the Garthna Geo bostonite, plain polarized (top) and crossed Nicols (bottom). Roughly equal amounts of potassic feldspar and albite form a dense texture with a faint preferred direction towards the lower left corner in the images. Many feldspar grains are zoned with albite cores and potassic feldspar rims. The matrix contains minor quartz (white) and ubiquitous opaques, mainly iron and iron-titanium oxides. Carbonates with varying amounts of Ca, Fe and Mg are intergrown with the feldspars.
