# Supplementary material
Source: publisher figshare collection journal article supplement (https://geolsoc.figshare.com/articles/dataset/_/3452978)
Supplement: Supplementary file 2 [file 1]

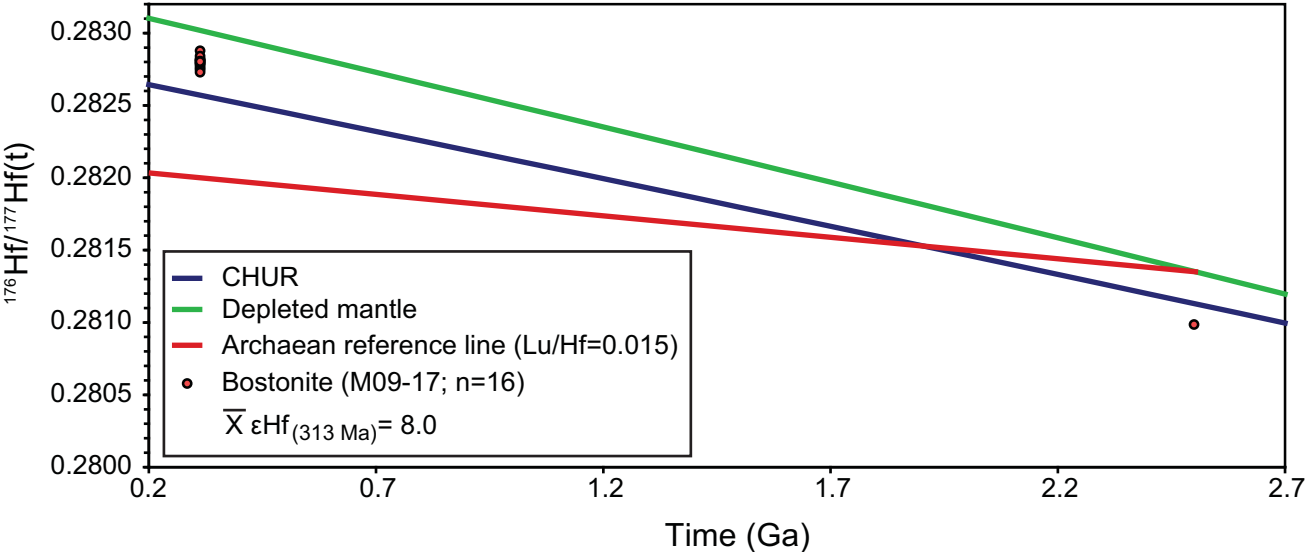

Appendix 6. Initial Hf isotope composition vs age diagram. Chondrite uniform reservoir (CHUR) and depleted mantle values calculated following Rosa et al. (2009), and references therein.

Rosa, D.R.N., Finch A.A., Andersen T. & Inverno, C.M.C. 2009. U-Pb geochronology and Hf isotope ratios of magmatic zircons from the Iberian Pyrite Belt. *Mineralogy and Petrology* 95, 47-69.
