# Supplementary material
Source: publisher figshare collection journal article supplement (https://geolsoc.figshare.com/articles/dataset/_/3452978)
Supplement: Supplementary file 3 [file 1]

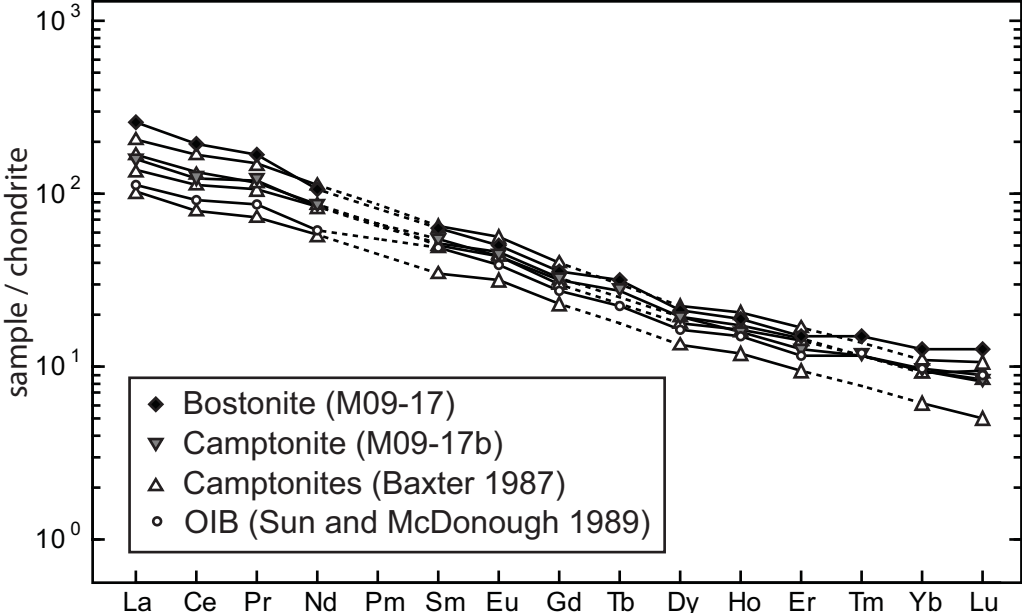

Appendix 5. REE diagram, chondrite normalized after Nakamura (1974).

Baxter, A.N. & Mitchell, J.G. 1984. Camptonite–monchiquite dyke swarms of Northern Scotland: age relationships and their implications. *Scottish Journal of Geology* 20, 297–308.

Nakamura, N. 1974. Determination of REE, Ba, Fe, Mg, Na and K in carbonaceous and ordinary chondrites. *Geochimica et Cosmochimica Acta* 38, 757–775.

Sun, S.-S. & McDonough, W.F.. 1984. Chemical and isotopic systematics of oceanic basalts: Implications for mantle composition and processes. In: Saunders, A.D. & Norry, M.J. (eds.) *Magma-tism in Oceanic Basins*. Geological Society, London, Special Publications 42, 313–345.
